# Supplementary material
Source: PubMed Central journal article supplement (PMC10263181)
Supplement: NIHMS1897836-supplement-Table_S1.pdf [file NIHMS1897836-supplement-Table_S1.pdf]

**Supplemental Table S1:**

| <b>List of ASOs</b> |                       |
|---------------------|-----------------------|
| <b>CTRL ASO</b>     | CCTTCCCTGAAGGTTCTCC   |
| <b>ASO1</b>         | CACTCATGCGAGCGGCTTTT  |
| <b>ASO2</b>         | GCACTCATGCGAGCGGCTTT  |
| <b>ASO3</b>         | CGCACTCATGCGAGCGGCTT  |
| <b>ASO4</b>         | GCGCACTCATGCGAGCGGCT  |
| <b>ASO5</b>         | GGCGCACTCATGCGAGCGGC  |
| <b>ASO6</b>         | GGGCGCACTCATGCGAGCGG  |
| <b>ASO7</b>         | AGGGCGCACTCATGCGAGCG  |
| <b>ASO8</b>         | GAGGGCGCACTCATGCGAGC  |
| <b>ASO9</b>         | AGAGGGCGCACTCATGCGAG  |
| <b>ASO10</b>        | TAGAGGGCGCACTCATGCGA  |
| <b>ASO11</b>        | GGGCAGTCTGCTTTGTACGA  |
| <b>ASO12</b>        | CGATT TGCGGGCAGTCTACT |
| <b>ASO13</b>        | TACCACCGGTCGATTTGCGG  |
| <b>ASO14</b>        | TTGCTTCCTGGGTGCTTTAC  |
| <b>ASO15</b>        | GAGGT TTCTTCACCCCTCCA |
