# Supplementary material
Source: PubMed Central journal article supplement (PMC10263181)
Supplement: NIHMS1897836-supplement-Table_S2.pdf [file NIHMS1897836-supplement-Table_S2.pdf]

**Supplemental Table S2:**

|                                                          |                                        |
|----------------------------------------------------------|----------------------------------------|
| Primers for gDNA <i>H3-3A</i>                            | Fwd5'-GGATCCGGCGGCGTGTGTTGGGGGATAGCCT  |
|                                                          | Rev5'CTTGAATTCTCACTGCAAAGCACCGATAGCTGC |
| Primers for <i>H3-3B</i> :                               | Fwd 5'- GTGCTGGTTTTTCGCTCGTC           |
|                                                          | Rev 5'- CTTTCGTGGCCAGCTGTTTG           |
| Primers for <i>H3-3A</i> :                               | Fwd 5'- GGACTTTAAAACAGATCTGCGCTT       |
|                                                          | Rev 5'- GTCTTTTGGCATAATTGTTACACGT      |
| Primers for <i>HPRT1</i> :                               | Fwd 5'- TGACCAGTCAACAGGGGACA           |
|                                                          | Rev 5'- TGCCTGACCAAGGAAAGCAA           |
| Primers for <i>H3-3A</i> <sup>K27M</sup> :               | Fwd 5'- GCTACAAAAGCCGCTCGAAT           |
|                                                          | Rev 5'- CCAGACGCTGGAAGGGAAGT           |
| Primers for <i>H3-3A</i> <sup>K27M</sup><br>in minigene: | Fwd 5'- GCTACAAAAGCCGCTCGAAT           |
|                                                          | Rev 5'-ATCTGCAGAATTCTCACTGC            |
| Primers for <i>H3-3A</i> <sup>WT</sup>                   | Fwd 5'- GCTACAAAAGCCGCTCTCAA           |
|                                                          | Rev 5'- CCAGACGCTGGAAGGGAAGT           |
| Primers for <i>H3-3A</i> <sup>WT</sup><br>in minigene:   | Fwd 5'- GCTACAAAAGCCGCTCTCAA           |
|                                                          | Rev 5'-ATCTGCAGAATTCTCACTGC            |
